# Supplementary material for: Effect of Bovine Colostrum Dietary Supplementation on Rabbit Meat Quality
Source: MDPI journal article supplement (doi:10.3390/foods11213433), 2022-10-29
Supplement: s1 [file s1]

## Supplementary material

**Table S1.** Prevalence (number and percentage of units that are contaminated, i.e. count >1 Log CFU/g) at day 0 (48 h post mortem) and during day 3 and 8 of storage for *Staphylococcus aureus*, *Enterobacteriaceae*, *E. coli*, and total coliforms. C = control diet; BC-2.5 = diet supplemented with 2.5% of bovine colostrum; BC-5 = diet supplemented with 5% of bovine colostrum.

| Microorganism (Log CFU/g)    | Group          | Day 0                  | Day 3                    | Day 8                  |
|------------------------------|----------------|------------------------|--------------------------|------------------------|
| <i>Staphylococcus aureus</i> | C              | 0 <sub>a</sub> (0.0%)  | 4 <sub>a</sub> (30.8%)   | 5 <sub>a</sub> (38.5%) |
|                              | BC-2.5         | 0 <sub>a</sub> (0.0%)  | 0 <sub>b</sub> (0.0%)    | 4 <sub>a</sub> (30.8%) |
|                              | BC-5           | 0 <sub>a</sub> (0.0%)  | 2 <sub>a,b</sub> (15.4%) | 3 <sub>a</sub> (23.1%) |
|                              | <i>P value</i> | -                      | 0.094                    | 0.697                  |
| <i>Enterobacteriaceae</i>    | C              | 4 <sub>a</sub> (30.8%) | 6 <sub>a</sub> (46.2%)   | 9 <sub>a</sub> (69.2%) |
|                              | BC-2.5         | 5 <sub>a</sub> (38.5%) | 7 <sub>a</sub> (53.8%)   | 8 <sub>a</sub> (61.5%) |
|                              | BC-5           | 6 <sub>a</sub> (46.2%) | 8 <sub>a</sub> (61.5%)   | 9 <sub>a</sub> (69.2%) |
|                              | <i>P value</i> | 0.723                  | 0.734                    | 0.891                  |
| <i>E. coli</i>               | C              | 0 <sub>a</sub> (0.0%)  | 0 <sub>a</sub> (0.0%)    | 1 <sub>a</sub> (7.7%)  |
|                              | BC-2.5         | 0 <sub>a</sub> (0.0%)  | 0 <sub>a</sub> (0.0%)    | 1 <sub>a</sub> (7.7%)  |
|                              | BC-5           | 0 <sub>a</sub> (0.0%)  | 0 <sub>a</sub> (0.0%)    | 1 <sub>a</sub> (7.7%)  |
|                              | <i>P value</i> | -                      | -                        | 1.000                  |
| Total coliforms              | C              | 4 <sub>a</sub> (30.8%) | 8 <sub>a</sub> (61.5%)   | 9 <sub>a</sub> (69.2%) |
|                              | BC-2.5         | 3 <sub>a</sub> (23.1%) | 6 <sub>a</sub> (46.2%)   | 6 <sub>a</sub> (46.2%) |
|                              | BC-5           | 2 <sub>a</sub> (15.4%) | 8 <sub>a</sub> (61.5%)   | 8 <sub>a</sub> (61.5%) |
|                              | <i>P value</i> | 0.648                  | 0.659                    | 0.476                  |

For each sub-table, values followed by the same letter in each column do not differ significantly ( $P < 0.05$ ).

**Table S2.** Numbers and percentages of unacceptable samples for each group at 48 h post mortem (Day 0), and during day 3, and 8 of storage. The following microbiological limits were set: *Staphylococcus aureus* < 4 Log CFU/g, *E. coli* ≤ 4 Log CFU/g, *Enterobacteriaceae* < 4 Log CFU/g and total coliforms ≤ 4 Log CFU/g. C = control diet; BC-2.5 = diet supplemented with 2.5% of bovine colostrum; BC-5 = diet supplemented with 5% of bovine colostrum.

| Microorganism (Log CFU/g)    | Group          | Day 0                  | Day 3                  | Day 8                  |
|------------------------------|----------------|------------------------|------------------------|------------------------|
| <i>Staphylococcus aureus</i> | C              | 0 <sub>a</sub> (0.0%)  | 0 <sub>a</sub> (0.0%)  | 0 <sub>a</sub> (0.0%)  |
|                              | BC-2.5         | 0 <sub>a</sub> (0.0%)  | 0 <sub>a</sub> (0.0%)  | 0 <sub>a</sub> (0.0%)  |
|                              | BC-5           | 0 <sub>a</sub> (0.0%)  | 0 <sub>a</sub> (0.0%)  | 0 <sub>a</sub> (0.0%)  |
|                              | <i>P value</i> | -                      | -                      | -                      |
| <i>Enterobacteriaceae</i>    | C              | 0 <sub>a</sub> (0.0%)  | 2 <sub>a</sub> (15.4%) | 4 <sub>a</sub> (30.8%) |
|                              | BC-2.5         | 2 <sub>a</sub> (15.4%) | 2 <sub>a</sub> (15.4%) | 5 <sub>a</sub> (38.5%) |
|                              | BC-5           | 0 <sub>a</sub> (0.0%)  | 5 <sub>a</sub> (38.5%) | 7 <sub>a</sub> (53.8%) |
|                              | <i>P value</i> | 0.316                  | 0.438                  | 0.606                  |
| <i>E. coli</i>               | C              | 0 <sub>a</sub> (0.0%)  | 0 <sub>a</sub> (0.0%)  | 0 <sub>a</sub> (0.0%)  |
|                              | BC-2.5         | 0 <sub>a</sub> (0.0%)  | 0 <sub>a</sub> (0.0%)  | 0 <sub>a</sub> (0.0%)  |
|                              | BC-5           | 0 <sub>a</sub> (0.0%)  | 0 <sub>a</sub> (0.0%)  | 0 <sub>a</sub> (0.0%)  |
|                              | <i>P value</i> | -                      | -                      | -                      |
| Total coliforms              | C              | 0 <sub>a</sub> (0.0%)  | 4 <sub>a</sub> (30.8%) | 6 <sub>a</sub> (46.2%) |
|                              | BC-2.5         | 0 <sub>a</sub> (0.0%)  | 3 <sub>a</sub> (23.1%) | 3 <sub>a</sub> (23.1%) |
|                              | BC-5           | 0 <sub>a</sub> (0.0%)  | 2 <sub>a</sub> (15.4%) | 4 <sub>a</sub> (30.8%) |
|                              | <i>P value</i> | -                      | 0.890                  | 0.582                  |

a: value followed by the same letter in each row do not differ significantly ( $P < 0.05$ ).
